# Supplementary material
Source: publisher figshare collection journal article supplement (https://tandf.figshare.com/ndownloader/files/10710280)
Supplement: Supplementary file 1 [file 10710280]

**
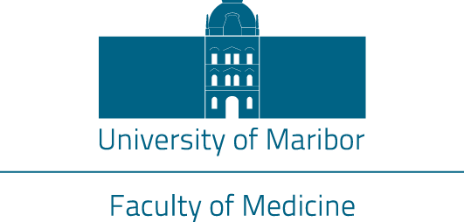
SUPPLEMENTAL INFORMATION**

**1 INFORMATION ON THE FACULTY OF MEDICINE**

The Faculty of Medicine, University of Maribor, Slovenia (MFUM) has been established in 2003 as the 2nd medical school in Slovenia (a country with approximately 2 million inhabitants). The first generation of undergraduate students enrolled in academic year 2004/2005. Since then our curriculum has already faced one major reform according to specific Bologna reform standards in 2008. First generation started this uniform master’s degree study programme of General Medicine in 2009/2010, still through high school entry. Since establishment there are more candidates than available places (two-three per each place). We enroll around 90 students annually and so far we have around 800 graduates.

**2 THE MEDICAL SCHOOL CURRICULUM**

Our undergraduate curriculum lasts for 6 years and is still subject based, but the subjects are tightly intertwined within individual study years (horizontal) and in-between those (vertical), among others by using problem based learning (PBL) modules (6.7% of curriculum) that like a spiral cover basics of medical theory and practice, advancing from preclinical emphasis to clinical. In Years 1-2 elective subjects are extended topics of preclinical subjects, whereas in Years 3-6 they are extended topics of clinical subjects (these elective subjects form 10% of curriculum). The programme is carried out in form of lectures, seminars and practical work (including simulation) and exclusively as full-time study. The program also enables international student and teaching staff exchange among medical faculties within EU and is in accordance with EU standards.

**3 THE SCHOOLS’ INTERNATIONAL ENGAGEMENT**

The school encourages e.g. by increasing the repertoire of international contracts, promotions, funding Erasmus practice and Erasmus exchange and International Federation of Medical Student Association elective exchanges. Students have also participated in internships at Texas Heart Institute and Memorial Herman Hospital, Houston USA. Exams taken during an Erasmus exchange are readily recognized by the school following a special study contract. So, Erasmus exchange does not encourage only culturally diverse experience but gives our students a possibility for active advancement through their studies.

All experience with foreign healthcare systems and education in duration exceeding 14 days (even students’ own incentives, e.g. 2 students performed additional electives in Oxford UK in 2011) credited and certified by the Diploma Supplement. Doing so, MFUM proves its highest support for international collaboration and global community as the Diploma Supplement is an official document introduced by Bologna Reform to certify comparably the graduate’s experience Europe-wide.

**3 STUDENT ENGAGEMENT IN THE COMMUNITY THROUGH EXTRACURRICULAR PROJECTS**

**The Faculty supports projects conducted by the teachers such as public health projects:**

1. ***Teddy Bear Hospital***: Kindergarten visits in order to facilitate the relationship between (future) physicians and children
2. ***Pedolandija***: a project aiming to increase hospitalized children’s wellbeing by delivering thematic workshops usually at bank holidays or other feast days
3. ***Love and sex***: students visit adolescents in schools and talk with them about safe-sex practice, sexually transmitted diseases and relationships in a teacher-free environment
4. ***Touch of life***: students teach high-school girls how to self-examine their breasts for any potential dangerous lumps and encourage them to pass on the skill to their mothers and grandmothers.

**Next to health projects, the students have the possibility to participate in students lead projects on culture and sports:**

1. ***Academic Choir***: currently composed of 35 medical student singers (biggest Academic choir in Maribor). They aim to provide opportunity for medical students to be culturally active, represent our medical school as cultural ambassadors, and to constantly improve their quality. In 2012 they had their first international performance in Austria. Mainly they perform at academic ceremonies and protocol events, organize own concerts, attend different competitions (at the national competition of adult choirs in 2009 they received the golden award from professional committee and the first place by audience choice). Traditional Christmas concert which more than 600 students, parents, faculty members and physicians attend each year. Obviously, the concert gives space for mingling between different age-groups of physicians. One of the future challenges is finding a solution to accommodate larger audience as the concert is quickly sold out.
2. ***The Drama group***, freshmen reception, motivational weekend for students to actively join projects, thematic parties etc.
3. Among the ***sporting events***, our students attended Batavierenrace in Netherlands, organised a sports day and regular compete in the University sports league: our basketball team won the tournament in 2011 and finished 2nd in 2012, volleyball team was 5th and soccer team 7th in 2011, 3rd place at University rafting competition in 2012.

**4 INFORMATION ON INTERNATIONAL HEALTHCARE STAYS IN DEVELOPING COUNTRIES**

During the student international healthcare stays in developing countries the students write blogs and social media posts:

- <http://odprava-malavi2010.blogspot.si>; <http://malavi-april-2013.stpm.org>; <https://www.facebook.com/Ugandabunyonyi2016/>

As well as video-document their journey:

- <https://www.youtube.com/watch?v=Tu9jnZ5bPi8>
